# Supplementary material for: Efficacy of Remdesivir-Containing Therapy in Hospitalized COVID-19 Patients: A Prospective Clinical Experience
Source: MDPI journal article supplement (doi:10.3390/jcm10173784), 2021-08-24
Supplement: s1 [file s1]

**Supplementary Table S1.** Univariate analysis before propensity score matching.

| Variables                                                                    | No remdesivir<br>N = 113 (%) | Remdesivir<br>N = 294 (%) | P value          |
|------------------------------------------------------------------------------|------------------------------|---------------------------|------------------|
| Male sex                                                                     | 70 (62%)                     | 250 (80%)                 | 0.760            |
| Age, year, mean ( $\pm$ SD)                                                  | 62.5 ( $\pm$ 20)             | 63.2 ( $\pm$ 15.3)        | 0.717            |
| Days from symptoms/positive nasopharyngeal swab to admission                 | 22 (23%)                     | 7 (7%)                    | 0.573            |
| Comorbidities                                                                | 77 (68%)                     | 213 (70%)                 | 0.919            |
| Cardiovascular disease                                                       | 17 (15%)                     | 33 (11%)                  | 0.203            |
| COPD                                                                         | 19 (17%)                     | 31 (10%)                  | 0.051            |
| Chronic kidney disease                                                       | 11 (12%)                     | 18 (6%)                   | 0.256            |
| Liver cirrhosis                                                              | 2 (2%)                       | 12 (4%)                   | 0.293            |
| Diabetes mellitus                                                            | 21 (19%)                     | 53 (17%)                  | 0.293            |
| Solid lung cancer (primary or metastasis)                                    | 1 (1%)                       | 3 (1%)                    | 1.000            |
| Fever                                                                        | 56 (50%)                     | 246(79%)                  | <b>&lt;0.001</b> |
| Cough                                                                        | 33 (29%)                     | 157 (50%)                 | <b>&lt;0.001</b> |
| Dyspnea                                                                      | 42 (37%)                     | 178 (57%)                 | <b>&lt;0.001</b> |
| Gastrointestinal symptoms (diarrhea, abdominal discomfort, nausea, vomiting) | 16 (14%)                     | 58 (18%)                  | 0.271            |
| Fatigue                                                                      | 21 (19%)                     | 57 (19%)                  | 1.000            |
| Pharyngodynia                                                                | 6 (5%)                       | 14 (5%)                   | 1.000            |
| Rhinitis                                                                     | 3 (3%)                       | 15 (5%)                   | 0.329            |
| Arthralgia/Myalgia                                                           | 13 (12%)                     | 45 (14%)                  | 0.460            |
| Anosmia                                                                      | 3 (3%)                       | 9 (3%)                    | 1.000            |
| Conjunctivitis                                                               | 0 (0%)                       | 2 (1%)                    | 0.647            |
| Chest pain                                                                   | 5 (4%)                       | 11 (3%)                   | 0.655            |
| Signs of overload (limb edema and/or pulmonary stasis)                       | 9 (9%)                       | 2 (1%)                    | <b>&lt;0.001</b> |
| Parenchymal thickening                                                       | 72 (64%)                     | 232(74%)                  | <b>0.046</b>     |
| Interstitial lung disease                                                    | 16 (14%)                     | 15 (5%)                   | <b>&lt;0.001</b> |
| Pleural effusion                                                             | 21 (18%)                     | 26 (9%)                   | <b>0.012</b>     |
| Cardiomegaly                                                                 | 8 (7%)                       | 16 (5%)                   | 0.438            |

| Variables                                              | No remdesivir<br>N = 113 (%) | Remdesivir<br>N = 294 (%) | P value          |
|--------------------------------------------------------|------------------------------|---------------------------|------------------|
| Bronchiectasis/ Emphysema                              | 27 (24%)                     | 50 (15%)                  | <b>0.032</b>     |
| White Blood cells x10 <sup>3</sup> /uL, mean (±SD)     | 7.38 (± 3.59)                | 8.06 (± 5.99)             | 0.287            |
| Neutrophils x10 <sup>3</sup> /uL, mean (±SD)           | 5.6 (± 3.61)                 | 6.31 (± 5.31)             | 0.211            |
| Platelets x10 <sup>3</sup> /uL, mean (±SD)             | 247.66 (± 100.85)            | 218.47 (± 81.73)          | <b>0.004</b>     |
| D-dimer ng/mL, mean (±SD)                              | 1365.71 (± 1456.18)          | 814.91 (± 766.45)         | <b>&lt;0.001</b> |
| Ferritin ng/mL, mean (±SD)                             | 692.35 (± 942.17)            | 645.02 (± 489.52)         | 0.591            |
| Procalcitonin ng/mL, mean (±SD)                        | 1.2 (± 6.4)                  | 0.61 (± 3.73)             | 0.334            |
| LDH mU/mL, mean (±SD)                                  | 286.46 (± 163.73)            | 302.37 (± 119.57)         | 0.300            |
| CPK U/L, mean (±SD)                                    | 278.9 (± 1430.6)             | 149.47 (± 161.35)         | 0.170            |
| Lactates mmol/L, mean (±SD)                            | 1.57 (± 0.36)                | 1.33 (± 0.83)             | 0.328            |
| C-reactive protein mg/dL, mean (±SD)                   | 4.91 (± 6.61)                | 8.23 (± 21.13)            | 0.116            |
| PaO <sub>2</sub> /FiO <sub>2</sub> , mean (±SD)        | 315.67 (± 117.14)            | 329.94 (± 98.36)          | 0.411            |
| Aspartate Transaminase U/L, mean (±SD)                 | 34.16 (± 47.76)              | 35.24 (± 27.41)           | 0.784            |
| Alanine transaminase U/L, mean (±SD)                   | 32.2 (± 28.42)               | 33.24 (± 28.84)           | 0.755            |
| Bacterial co-infection                                 | 24 (21%)                     | 65 (20%)                  | 0.928            |
| Days of hospitalization, mean (±SD)                    | 16.1 (± 17.62)               | 15.0 (± 9.98)             | 0.487            |
| Days to nasopharyngeal swab negativization, mean (±SD) | 24.77 (± 17.1)               | 22.6 (± 13.77)            | 0.387            |
| 30-day mortality                                       | 4 (4%)                       | 17 (6%)                   | 0.411            |
| No Steroids                                            | 92 (81%)                     | 289 (93%)                 | <b>&lt;0.001</b> |
| Antibiotics (excluding Macrolides)                     | 65 (58%)                     | 83 (27%)                  | <b>&lt;0.001</b> |
| Macrolides                                             | 74 (65%)                     | 146 (46%)                 | <b>0.001</b>     |
| No Low-molecular-weight heparin                        | 73 (65%)                     | 76 (87%)                  | 0.749            |
| Low-flow oxygen therapy/no need of oxygen therapy      | 89 (79%)                     | 275 (79%)                 | <b>0.044</b>     |
| HFNC/NIV                                               | 17 (15%)                     | 33 (10%)                  | 0.155            |
| Mechanical ventilation                                 | 1 (1%)                       | 10 (3%)                   | 0.200            |

**Legend.** COPD: chronic obstructive pulmonary disease; LDH: lactate dehydrogenase; CPK: creatine phosphokinase; HFNC: high flow nasal cannula; NIV: non-invasive ventilation.

**Supplementary Table S2.** Univariate analysis after propensity score matching.

| Variables                                                                    | No remdesivir<br>N = 71 (%) | Remdesivir<br>N = 71 (%) | P value          |
|------------------------------------------------------------------------------|-----------------------------|--------------------------|------------------|
| Male sex                                                                     | 48 (68%)                    | 52 (73%)                 | 0.466            |
| Age, year, mean ( $\pm$ SD)                                                  | 63 ( $\pm$ 19)              | 74 ( $\pm$ 12)           | <b>&lt;0.001</b> |
| Days from symptoms/positive nasopharyngeal swab to admission                 | 20 (28%)                    | 6 (8%)                   | 0.279            |
| Comorbidities                                                                | 46 (65%)                    | 63 (89%)                 | <b>&lt;0.001</b> |
| Cardiovascular disease                                                       | 14 (20%)                    | 20 (28%)                 | 0.265            |
| COPD                                                                         | 12 (17%)                    | 17 (24%)                 | 0.323            |
| Chronic kidney disease                                                       | 7 (10%)                     | 8 (11%)                  | 0.815            |
| Liver cirrhosis                                                              | 0 (0%)                      | 5 (7%)                   | 0.104            |
| Diabetes mellitus                                                            | 7 (10%)                     | 18 (25%)                 | <b>0.016</b>     |
| Solid lung cancer (primary or metastasis)                                    | 1 (1%)                      | 3 (4%)                   | 0.455            |
| Fever                                                                        | 33 (46%)                    | 49 (69%)                 | <b>0.008</b>     |
| Cough                                                                        | 17 (24%)                    | 37 (52%)                 | <b>&lt;0.001</b> |
| Dyspnea                                                                      | 34 (48%)                    | 40 (56%)                 | 0.277            |
| Gastrointestinal symptoms (diarrhea, abdominal discomfort, nausea, vomiting) | 7 (10%)                     | 16 (23%)                 | <b>0.035</b>     |
| Fatigue                                                                      | 14 (20%)                    | 7 (10%)                  | 0.115            |
| Pharyngodynia                                                                | 2 (3%)                      | 2 (3%)                   | 1.000            |
| Rhinitis                                                                     | 8 (11%)                     | 4 (6%)                   | 0.295            |
| Arthralgia/Myalgia                                                           | 6 (8%)                      | 6 (8%)                   | 1.000            |
| Anosmia                                                                      | 1 (1%)                      | 2 (3%)                   | 0.801            |
| Conjunctivitis                                                               | 0 (0%)                      | 2 (3%)                   | 0.160            |
| Chest pain                                                                   | 3 (4%)                      | 3 (4%)                   | 1.000            |
| Signs of overload (limb edema and/or pulmonary stasis)                       | 6 (8%)                      | 0 (0%)                   | <b>0.012</b>     |
| Parenchymal thickening                                                       | 38 (54%)                    | 50 (70%)                 | <b>0.038</b>     |
| Interstitial lung disease                                                    | 9 (13%)                     | 4 (6%)                   | <b>&lt;0.001</b> |
| Pleural effusion                                                             | 18 (25%)                    | 7 (10%)                  | 0.118            |
| Cardiomegaly                                                                 | 6 (8%)                      | 3 (4%)                   | 0.417            |
| Bronchiectasis/ Emphysema                                                    | 18 (25%)                    | 22 (31%)                 | 0.724            |
| White Blood cells $\times 10^3/\mu\text{L}$ , mean ( $\pm$ SD)               | 7.92 ( $\pm$ 4.54)          | 9.9( $\pm$ 9.15)         | 0.107            |
| Neutrophils $\times 10^3/\mu\text{L}$ , mean ( $\pm$ SD)                     | 6.45 ( $\pm$ 4.60)          | 8.56 ( $\pm$ 8.77)       | 0.075            |
| Platelets $\times 10^3/\mu\text{L}$ , mean ( $\pm$ SD)                       | 240.48 ( $\pm$ 90.1)        | 219.37 ( $\pm$ 89.0)     | 0.165            |
| D-dimer ng/mL, mean ( $\pm$ SD)                                              | 1337.99 ( $\pm$ 1349.44)    | 1065.42 ( $\pm$ 902.01)  | 0.160            |
| Ferritin ng/mL, mean ( $\pm$ SD)                                             | 669.77 ( $\pm$ 723.69)      | 704.94 ( $\pm$ 407.35)   | 0.722            |
| Procalcitonin ng/mL, mean ( $\pm$ SD)                                        | 0.64 ( $\pm$ 1.34)          | 1.58 ( $\pm$ 5.99)       | 0.204            |
| LDH mU/mL, mean ( $\pm$ SD)                                                  | 339.46 ( $\pm$ 212.05)      | 326.13 ( $\pm$ 116.49)   | 0.644            |
| CPK U/L, mean ( $\pm$ SD)                                                    | 397.77 ( $\pm$ 1716.54)     | 141.90 ( $\pm$ 125.43)   | 0.214            |

| Variables                                                    | No remdesivir<br>N = 71 (%) | Remdesivir<br>N = 71 (%) | P value |
|--------------------------------------------------------------|-----------------------------|--------------------------|---------|
| Lactates mmol/L, mean ( $\pm$ SD)                            | 1.5 ( $\pm$ 0.14)           | 1.51 ( $\pm$ 0.74)       | 0.874   |
| C-reactive protein mg/dL, mean ( $\pm$ SD)                   | 6.3 ( $\pm$ 8.77)           | 8.45 ( $\pm$ 6.77)       | 0.103   |
| PaO <sub>2</sub> /FiO <sub>2</sub> , mean ( $\pm$ SD)        | 308.32 ( $\pm$ 80.86)       | 303.05 ( $\pm$ 99.85)    | 0.731   |
| Aspartate Transaminase U/L, mean ( $\pm$ SD)                 | 44.79 ( $\pm$ 63.35)        | 32.62 ( $\pm$ 15.04)     | 0.119   |
| Alanine transaminase U/L, mean ( $\pm$ SD)                   | 34.8 ( $\pm$ 29.4)          | 27.71 ( $\pm$ 15.39)     | 0.075   |
| Bacterial co-infection                                       | 12 (17%)                    | 17 (24%)                 | 0.258   |
| Days of hospitalization, mean ( $\pm$ SD)                    | 16.4 ( $\pm$ 17.1)          | 17.8 ( $\pm$ 12.3)       | 0.591   |
| Days to nasopharyngeal swab negativization, mean ( $\pm$ SD) | 23.2 ( $\pm$ 9.5)           | 23 ( $\pm$ 10)           | 0.511   |
| 30-day mortality                                             | 2 (3%)                      | 7 (10%)                  | 0.515   |
| No Steroids                                                  | 59 (83%)                    | 55 (77%)                 | 0.926   |
| Antibiotics (excluding Macrolides)                           | 34 (48%)                    | 25 (35%)                 | 0.345   |
| Macrolides                                                   | 45 (63%)                    | 41 (58%)                 | 0.953   |
| No Low-molecular-weight heparin                              | 57 (80%)                    | 55 (77%)                 | 0.749   |
| Low-flow oxygen therapy/no need of oxygen therapy            | 53 (75%)                    | 52 (73%)                 | 0.760   |
| HFNC/NIV                                                     | 17 (24%)                    | 17 (24%)                 | 0.877   |
| Mechanical ventilation                                       | 2 (3%)                      | 3 (3%)                   | 0.848   |
| Propensity score, mean ( $\pm$ SD)                           | 0.58 ( $\pm$ 0.31)          | 0.57 ( $\pm$ 0.32)       | 0.895   |
| Propensity score weight simple size                          | 71 (100%)                   | 71 (100%)                | 1.000   |

**Legend.** COPD: chronic obstructive pulmonary disease; LDH: lactate dehydrogenase; CPK: creatine phosphokinase; HFNC: high flow nasal cannula; NIV: non-invasive ventilation.

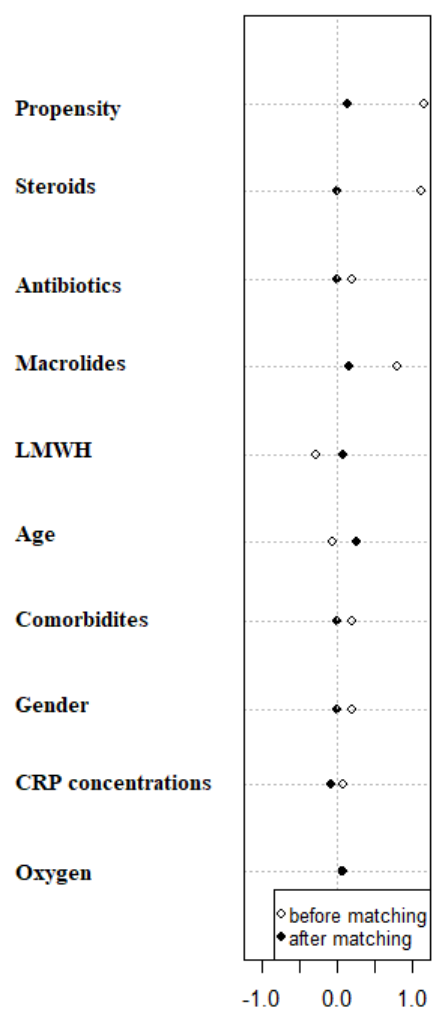

**Standardized differences before matching**

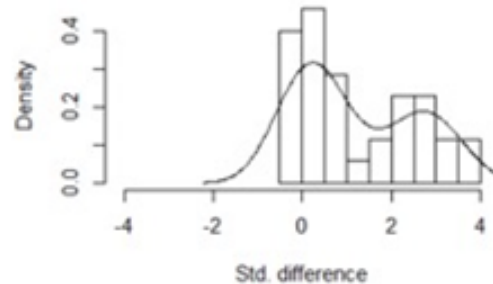

**Standardized differences after matching**

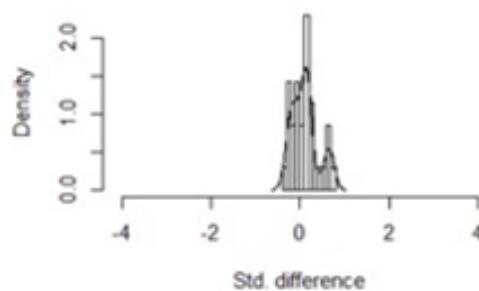

**Supplementary Figure S1.** Standardized differences before and after propensity score matching.
